# Supplementary material
Source: HighWire-hosted journal article supplement (https://dmd.aspetjournals.org/highwire/filestream/80020/field_highwire_adjunct_files/0/744_supp_fig.pdf)
Supplement: 744_supp_fig.pdf [file 744_supp_fig.pdf]

**DMD-MR-2021-000744**

**SUPPLEMENTAL INFORMATION**

**Journal:**

Drug Metabolism and Disposition

**Article:**

**Unusual Biotransformation Reactions of Drugs and Drug Candidates**

Emre M. Isin, Translational Medicine, Servier, 25/27 Rue Eugène Vignat, 45000, Orléans,  
France

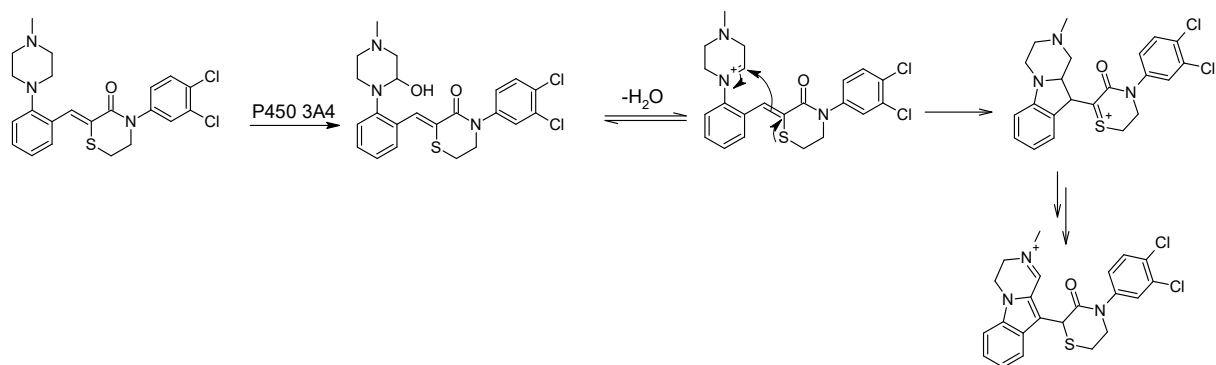

**Supplemental Figure 1. Proposed mechanism for the formation of an indole iminium metabolite from elzasonan in human. (This figure is based on the data from Kamel *et al.*, (2010) with permission from ASPET)**
